# Supplementary figures and images for: Pathogenicity, Host Resistance, and Genetic Diversity of Fusarium Species under Controlled Conditions from Soybean in Canada
Source: MDPI journal article supplement (doi:10.3390/jof10050303), 2024-04-23

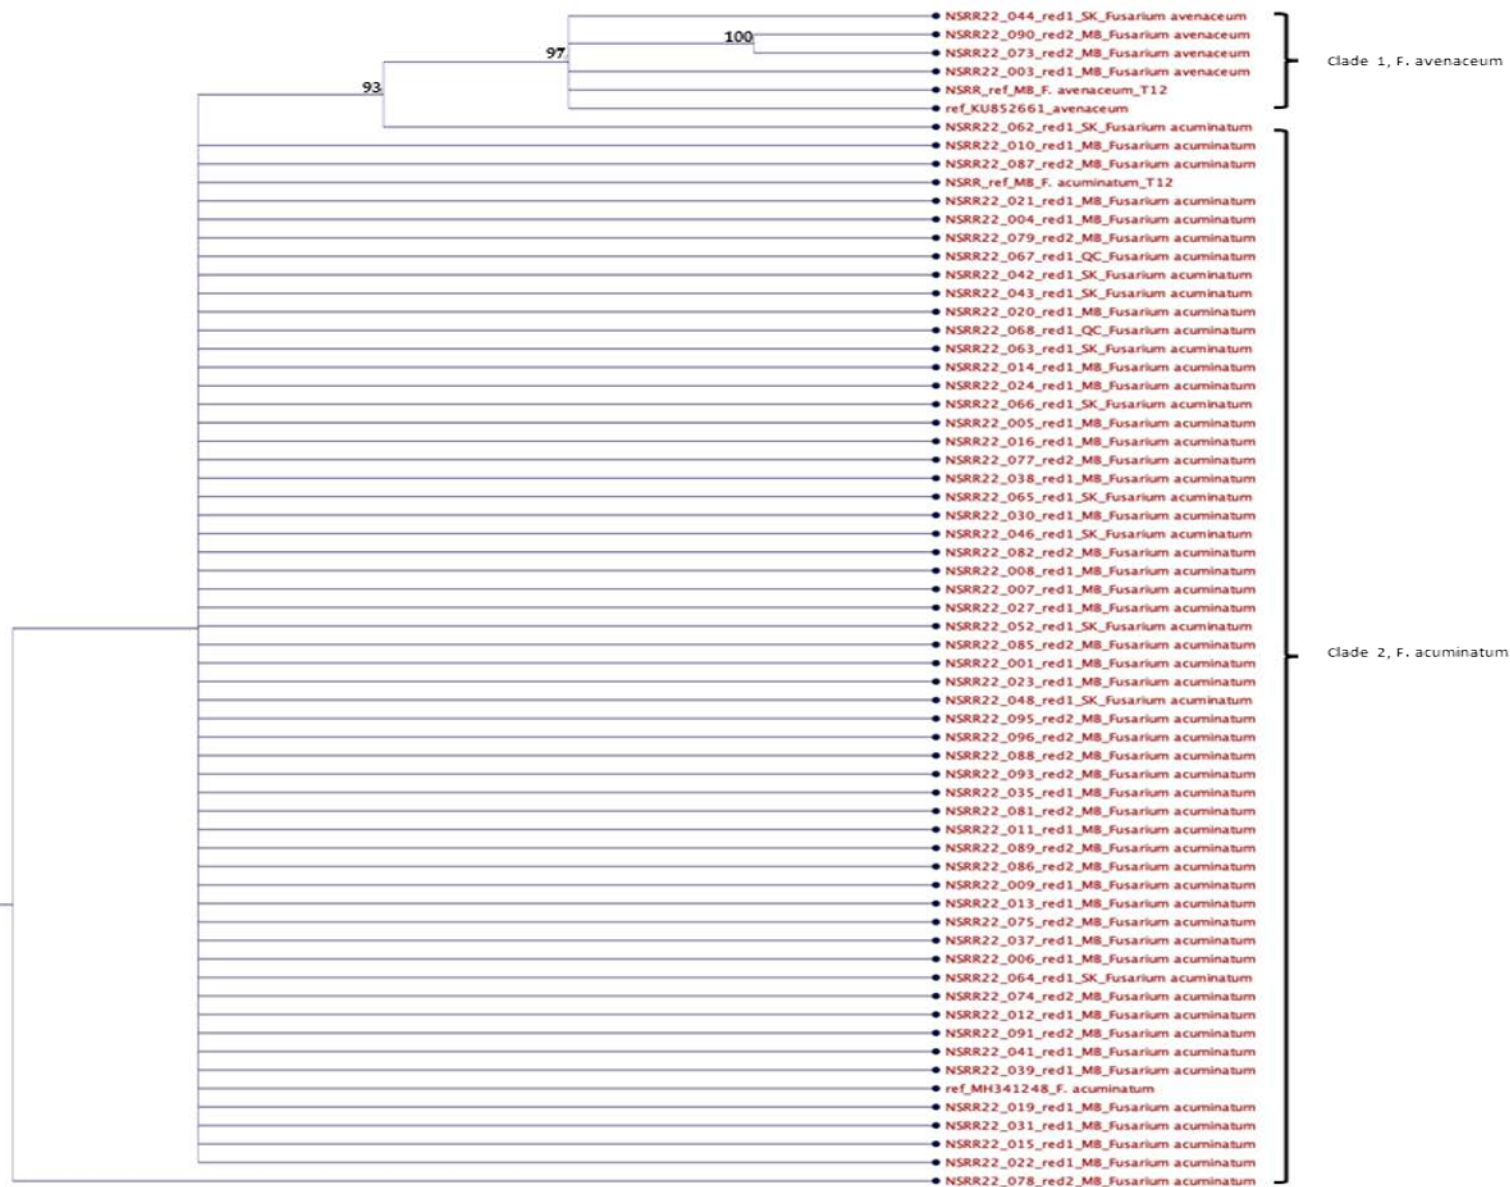

Supplement: s1 [file s1]
